# Supplementary material for: Respiratory Syncytial Virus-Load Kinetics and Clinical Course of Acute Bronchiolitis in Hospitalized Infants: Interim Results and Review of the Literature
Source: MDPI journal article supplement (doi:10.3390/pathogens12050645), 2023-04-27
Supplement: s1 [file s1]

## Supplementary materials

| Reference | Study design and population, Specimen collection, Exclusion criteria                                                                                                                                                                                                                                                                                                                                     | Sample size and number of cases                                                                                    | Outcome – measure of interest                                                                         | Results (p value)                                                                                                                                                                                                          |
|-----------|----------------------------------------------------------------------------------------------------------------------------------------------------------------------------------------------------------------------------------------------------------------------------------------------------------------------------------------------------------------------------------------------------------|--------------------------------------------------------------------------------------------------------------------|-------------------------------------------------------------------------------------------------------|----------------------------------------------------------------------------------------------------------------------------------------------------------------------------------------------------------------------------|
| [8]       | Prospective study on hospitalized children (10 d – 4 y, median age 4 mo) with RSV ARI, in a subgroup of 19 infants < 11 mo NW at admission and every 1-3 d throughout hospitalization with RSV culture ( $\log_{10}$ TCID <sub>50</sub> /mL),<br><b>No exclusion criteria</b>                                                                                                                            | 59 patients,<br>19/59 infants with NW,<br>17/19 with pneumonia $\pm$ bronchiolitis,<br>2/19 with bronchiolitis     | Presence of pulmonary consolidation,<br>Hypoxia,<br>LOS                                               | Significant correlation between greater quantities of RSV and pulmonary consolidation ( $p < 0.025$ ),<br>no significant correlation between greater quantities of RSV and hypoxia and/or prolonged LOS ( $p > 0.05$ )     |
| [9]       | Prospective study on hospitalized < 2 years children with RSV infection, nasal aspirate at admission with RSV culture ( $\log_{10}$ PFU/mL)<br><b>Exclusion criteria:</b> BPD, hemodynamically significant CHD, ID, SCS treatment within the 3 weeks before admission, Ribavirin treatment, RSV immunoglobulin or RSV-specific Ab treatment within the 3 months before enrollment, need for MV for apnea | 39 patients,<br>15/39 severe bronchiolitis<br>(= need for MV during hospitalization),<br>24/39 non-severe          | Disease severity<br>(= need for MV during hospitalization)                                            | Significant correlation between higher nasal RSV quantities and severe bronchiolitis ( $p = 0.022$ )                                                                                                                       |
| [11]      | Prospective observational study on previously healthy children < 2 years hospitalized for RSV bronchiolitis, nasal aspirate at admission with RSV culture ( $\log_{10}$ PFU/mL)<br><b>Exclusion criteria:</b> BPD, ID, hemodynamically significant CHD, SCS treatment in the preceding month, positive blood cultures                                                                                    | 141 patients                                                                                                       | LOS,<br>Need for PICU,<br>need for MV                                                                 | Significant correlation between higher nasal RSV quantity and longer LOS ( $p = 0.008$ ; a 1 log PFU/mL higher RSV load predicted 0.8 days longer LOS),<br>need for PICU ( $p = 0.0049$ ),<br>need for MV ( $p = 0.0048$ ) |
| [12]      | Prospective study on previously healthy infants < 1 year hospitalized for RSV bronchiolitis, NPA (once for patient) with RSV load by RT-PCR (RSV-RNA transcript/ $\mu$ L)<br><b>Exclusion criteria:</b> BPD, Hemodynamically significant CHD, ID, SCS treatment within the 3 weeks before admission, Ribavirin treatment, RSV-specific Ab preparations within the 3 months before enrollment             | 81 patients,<br>28/81 with risk factors for severe disease (prematurity and/or LBW),<br>53/81 without risk factors | Severe disease intended as:<br>- RR > 60 bpm,<br>- LOS > 7 days,<br>- Need for PICU,<br>- Need for MV | Significant correlation between higher RSV load and severe bronchiolitis in both patients with risk factors ( $p = 0.024$ ) and without risk factors ( $p = 0.027$ )                                                       |
| [13]      | Prospective observational study on previously healthy infants < 6 mo outpatients with first RTI, NPA at enrollment with viral load expressed by PCR-CT values (inverse linear relationship between viral load and CT-values)<br><b>Exclusion criteria:</b> NA                                                                                                                                            | 82 infants,<br>30/82 infants with RSV infection,<br>11/30 infants with RSV as sole pathogen                        | Specified disease severity score                                                                      | Significant correlation between RSV viral load and disease severity score value in infants with RSV infection ( $p = 0.003$ ) even when RSV as sole pathogen ( $p = 0.02$ )                                                |
| [14]      | Prospective monocentric study on previously healthy children $\leq$ 2 years                                                                                                                                                                                                                                                                                                                              | 219 patients,                                                                                                      | Hospital admission,                                                                                   | Significant correlation between higher RSV load                                                                                                                                                                            |

|      |                                                                                                                                                                                                                                                                                                                                                                                                                                                                                                                                             |                                                                                                                                                                                                                                   |                                                                  |                                                                                                                                                                                                                                                                                                                                                                  |
|------|---------------------------------------------------------------------------------------------------------------------------------------------------------------------------------------------------------------------------------------------------------------------------------------------------------------------------------------------------------------------------------------------------------------------------------------------------------------------------------------------------------------------------------------------|-----------------------------------------------------------------------------------------------------------------------------------------------------------------------------------------------------------------------------------|------------------------------------------------------------------|------------------------------------------------------------------------------------------------------------------------------------------------------------------------------------------------------------------------------------------------------------------------------------------------------------------------------------------------------------------|
|      | with RSV infection, NPA or ET aspirate at admission and daily until discharge, RSV load ( $\log_{10}$ PFU/mL)<br><b>Exclusion criteria:</b> BPD, hemodynamically significant CHD, ID, SCS treatment within the preceding month, positive blood cultures                                                                                                                                                                                                                                                                                     | 192/219 hospitalized<br>218/219 samples on day 1,<br>102/219 samples on day 2,<br>41/219 samples on day 3                                                                                                                         | LOS,<br>Need for PICU,<br>Need for MV                            | and prolonged LOS ( $p < 0.001$ ; RSV load increase of 1 log PFU/mL predicted 1 additional day in LOS), between higher RSV load on day 3 and need for PICU ( $p = 0.009$ ), between reduced clearance ( $\Delta$ viral load d 1-3) and prolonged LOS ( $p = 0.035$ )                                                                                             |
| [16] | Prospective study on children $< 3$ years (median age 2.2 mo) hospitalized for RSV bronchiolitis, NPW at admission, RSV load (log copy number of RSV-RNA/mL)<br><b>Exclusion criteria:</b> Underlying chronic condition (prematurity, BPD, CF, CHD, ID) and recurrent (more than one) wheezing episodes                                                                                                                                                                                                                                     | 132 patients                                                                                                                                                                                                                      | Specified disease severity score,<br>LOS                         | Significant correlation between higher RSV load and higher value of severity score ( $p = 0.024$ ) and between higher RSV load and prolonged LOS ( $p = 0.038$ )                                                                                                                                                                                                 |
| [17] | Prospective study on previously healthy children $\leq 2$ years hospitalized for bronchiolitis, NPA at admission, day 3, day 5, day 7, RSV load ( $\log_{10}$ copy number of RSV-RNA/mL)<br><b>Exclusion criteria:</b> Recurrent wheezing, Ribavirin or SCS treatment in the preceding two weeks                                                                                                                                                                                                                                            | 60 patients,<br>40/60 with RSV bronchiolitis (age $< 1$ year),<br>18/40 severe bronchiolitis,<br>18/40 moderate bronchiolitis,<br>4/40 mild bronchiolitis                                                                         | Specified disease severity score                                 | Significant correlation between higher RSV load and higher disease severity score value ( $p < 0.001$ ), significant differences in the mean RSV load between the mild group and the severe group ( $p = 0.014$ )                                                                                                                                                |
| [18] | Prospective multicenter study on children $< 2$ years hospitalized for bronchiolitis, NPA at admission, RSV load expressed by PCR-CT values (inverse linear relationship between viral load and CT-values)<br><b>Exclusion criteria:</b> Enrollment in previous studies, Enrollment $> 48$ hours since hospital admission                                                                                                                                                                                                                   | 2615 patients,<br>1764/2615 RSV infection,<br>587/1764 low RSV genomic load,<br>598/1764 medium load,<br>579/1764 high load,<br>1223 patients with a stricter definition of bronchiolitis (age $\leq 1$ year, GA $\geq 37$ weeks) | LOS,<br>need for PICU                                            | Significant correlation between higher RSV genomic load and risk of LOS $\geq 3$ days (OR 1.58, $p < 0.001$ ), even in the subgroup with a stricter definition (OR 1.46, $p = 0.01$ ), significant correlation between higher RSV genomic load and PICU (OR 1.43, $p = 0.03$ ), without correlation in the subgroup without a stricter definition ( $p > 0.05$ ) |
| [19] | Double-blinded RCT (inhaled racemic adrenaline vs. saline) on infant $< 1$ year hospitalized for bronchiolitis with specified severity score values $\geq 4$ (moderate-severe illness), NPA at admission with RSV load expressed by PCR-CT values (inverse linear relationship between viral load and CT-values)<br><b>Exclusion criteria:</b> presence of any serious cardiac, immunologic, neurologic, oncologic, pulmonary disease other than bronchiolitis, $>1$ previous episode of obstructive airway disease, symptoms of disease of | 404 patients,<br>363/404 patients with NPA,<br>300/363 RSV infection,<br>200/363 high RSV load,<br>89/363 RSV single infection                                                                                                    | LOS,<br>need for oxygen therapy,<br>need for ventilatory support | Significant association between higher RSV load and prolonged LOS ( $p = 0.042$ ), need for oxygen therapy ( $p = 0.006$ ) or ventilatory support ( $p = 0.021$ )                                                                                                                                                                                                |

|      |                                                                                                                                                                                                                                                                                                                                                                                                                   |                                                                                                                                           |                                                                               |                                                                                                                                                                                                                                                                                                                                                                                                              |
|------|-------------------------------------------------------------------------------------------------------------------------------------------------------------------------------------------------------------------------------------------------------------------------------------------------------------------------------------------------------------------------------------------------------------------|-------------------------------------------------------------------------------------------------------------------------------------------|-------------------------------------------------------------------------------|--------------------------------------------------------------------------------------------------------------------------------------------------------------------------------------------------------------------------------------------------------------------------------------------------------------------------------------------------------------------------------------------------------------|
|      | the lower airway (e.g. coughing) for >4 weeks, An CS treatment in the preceding 4 weeks                                                                                                                                                                                                                                                                                                                           |                                                                                                                                           |                                                                               |                                                                                                                                                                                                                                                                                                                                                                                                              |
| [22] | Observational analytical cross-sectional study on infants < 1 year hospitalized for RSV LRTI, NPA < 3 d or ≥ 3 d from illness with RSV genomic load expressed by PCR-CT values (inverse linear relationship between viral load and CT-values)<br><b>Exclusion criteria:</b> Prematurity, ID, documented chronic lung or heart disease, possible bacterial infection                                               | 86 infants with RSV LRTI<br>49/86 moderate clinical score disease severity values,<br>37/86 severe clinical score disease severity values | Specified clinical score disease severity                                     | Significant correlation between higher RSV genomic loads and severe RSV LRTI in later LRTI stage (NPA ≥ 3 d; p = 0.04)                                                                                                                                                                                                                                                                                       |
| [25] | Prospective study on infants 0-6 mo hospitalized for RSV±RV bronchiolitis, NPA at admission with RSV load expressed by PCR-CT values (inverse linear relationship between viral load and CT-values)<br><b>Exclusion criteria:</b> Recent (≤ 30 d before current infection) or current SCS treatment, Recent (≤ 15 d before current infection) or current antibiotic treatment, Previous wheezing crisis, CHD, BPD | 70 patients,<br>61/70 infants RSV infection,<br>49/61 sole-RSV infection,<br>12/61 RSV+RV infection                                       | LOS,<br>ICU stay,<br>Oxygen therapy duration,<br>Respiratory support duration | In patients with sole-RSV infection, higher RSV load is a risk factor for prolonged LOS (OR 3.23, p = 0.012), prolonged ICU stay (OR 2.03, p = 0.036), prolonged oxygen therapy duration (OR 2.96, p = 0.011), prolonged respiratory support duration (OR 1.84, p = 0.021); in patients with RSV+RV infection, a higher RSV load is a risk factor for prolonged oxygen therapy duration (OR 4.78, p = 0.017) |

**Table S1.** Studies with results supporting a direct relation between RSV load and bronchiolitis severity.

Note: Ab = antibodies, ARI = acute respiratory infection, BPD = bronchopulmonary dysplasia, bpm = breaths per minute, CF = cystic fibrosis, CHD = congenital heart disease, CPAP = Continuous Positive Airways Pressure, CT = cycle threshold, d = days, ED = Emergency Department, ET = endotracheal tube, GW = General Ward, ID = immunodeficiency, IVIG = intravenous immunoglobulin, LBW = low birth weight, LOS = length of stay, LRTI = low respiratory tract infection, mo = months, MV = mechanical ventilation, NA = not available, NPA = nasopharyngeal aspirate, NPW = nasopharyngeal wash, NW = nasal wash, PFU = plaque-forming units, PICU = Pediatric Intensive Care Unit, RTI = respiratory tract infection, RT-PCR = Real Time Polymerase Chain Reaction, SCS = systemic corticosteroids, RR = respiratory rate, RSV = Respiratory Syncytial Virus, RV = Rhinovirus, SatO<sub>2</sub> = oxygen saturation, TCID<sub>50</sub> = 50% tissue culture infectious dose, URTI = upper respiratory tract infection, w = weeks, y = years.

| Reference | Study design and population, Specimen collection, Exclusion criteria                                                                                                                                                                                                                                                                                                                                                                                                                                                                                   | Sample size and number of cases                                                                  | Outcome – measure of interest                                                     | Results (p value)                                                                                                                                                                                                                      |
|-----------|--------------------------------------------------------------------------------------------------------------------------------------------------------------------------------------------------------------------------------------------------------------------------------------------------------------------------------------------------------------------------------------------------------------------------------------------------------------------------------------------------------------------------------------------------------|--------------------------------------------------------------------------------------------------|-----------------------------------------------------------------------------------|----------------------------------------------------------------------------------------------------------------------------------------------------------------------------------------------------------------------------------------|
| [23]      | Prospective cross-sectional study on children ≤ 2 years with diagnosis of bronchiolitis in ED, NW at enrollment with copy numbers measurement of 5 different RSV genes (NS1, NS2, N, G and F)<br><b>No exclusion criteria</b>                                                                                                                                                                                                                                                                                                                          | 112 patients,<br>79/112 with RSV infection,<br>41/79 hospitalized patients,<br>38/79 outpatients | Hospitalization,<br>SatO <sub>2</sub>                                             | Significant correlation between higher RSV gene copy numbers (except F) and non-hospitalization (p = 0.01 – 0.04);<br>significant correlation between higher RSV gene NS1, NS2, N copy numbers and higher SatO <sub>2</sub> (p = 0.03) |
| [24]      | Prospective study on children 2 w – 2 y and weight > 2 Kg (also with non-respiratory comorbidities, e.g. prematurity) hospitalized with PCR-confirmed viral bronchiolitis, NPA up to twice daily during hospitalization with RSV load (RSV-RNA copies/mL)<br><b>Exclusion criteria:</b> any local or systemic factor that could influence the safety of nasal sampling (e.g., bleeding disorders), presence of nasal cannulae in both nostrils, palliative care, respiratory comorbidity                                                               | 55 patients,<br>30/55 patients with RSV,<br>12/30 severe (PICU),<br>18/30 moderate (GW)          | Severity disease defined by the type of hospitalization (PICU or GW)              | Significantly higher RSV load in moderate than in severe cases (p = 0.001), with a significant decreasing in viral load in severe RSV cases relative to moderate ones (p = 0.001)                                                      |
| [7]       | Prospective study on healthy children < 2 years hospitalized or evaluated in outpatient setting for RSV infection, nasal swab only at admission in outpatients, once a day during hospitalization, with RSV load (log <sub>10</sub> copy number of RSV-RNA/mL)<br><b>Exclusion criteria:</b> duration of illness >7 days, prematurity, underlying medical conditions (i.e. CHD, BPD, ID), use of immunomodulatory drugs (including SCS) > 5 days within 2 weeks of presentation, previous history of wheezing or hospitalization for RSV bronchiolitis | 150 children with RSV infection,<br>111/150 hospitalized<br>39/150 outpatients,                  | Specified clinical severity score,<br>Hospitalization,<br>Need for oxygen therapy | Significant correlation between higher RSV load and outpatients (p = 0.003), lower clinical score value in outpatients (p = 0.0002), lower need of oxygen therapy in hospitalized patients (p = 0.04)                                  |

Table S2. Studies finding an inverse correlation between RSV load and bronchiolitis severity.

| Reference | Study design and population, Specimen collection, Exclusion criteria                                                                                                                                                                                                                                                                                                                                                                                                                                  | Sample size and number of cases                                                                                                                                                          | Outcome – measure of interest                           | Results (p value)                                                                                                                            |
|-----------|-------------------------------------------------------------------------------------------------------------------------------------------------------------------------------------------------------------------------------------------------------------------------------------------------------------------------------------------------------------------------------------------------------------------------------------------------------------------------------------------------------|------------------------------------------------------------------------------------------------------------------------------------------------------------------------------------------|---------------------------------------------------------|----------------------------------------------------------------------------------------------------------------------------------------------|
| [10]      | Multicenter double-blind placebo-controlled RCT on children $\leq 2$ years hospitalized with RSV bronchiolitis, admission and subsequently daily NW or ET aspirate with RSV culture ( $\log_{10}$ PFU/mL)<br><b>Exclusion criteria:</b> ID, CF, reactive airways disease or asthma, poorly controlled CHD, renal failure, ventilator dependency at the enrollment, life expectancy $< 6$ mo, apnea without evidence of LRTI, IVIG therapy in the preceding 2 months, Ribavirin in the preceding month | 77 patients,<br>33/77 healthy infants,<br>18/77 infants with CHD $\pm$ BPD $\pm$ prematurity ( $< 32$ w),<br>11/77 infants with BPD $\pm$ prematurity,<br>15/77 infants with prematurity | Specified respiratory illness score                     | No correlation between severity of illness judged by respiratory illness score and RSV titer ( $p > 0.05$ )                                  |
| [15]      | Cross-sectional study on children $\leq 2$ years hospitalized for LRTI, NPA at admission with RSV load expressed by PCR-CT values (inverse linear relationship between viral load and CT-values)<br><b>Exclusion criteria:</b> NA                                                                                                                                                                                                                                                                     | 120 patients,<br>98/120 viral positive NPA,<br>58/98 with RSV infection,<br>27/98 with RV infection,<br>11/98 RSV+RV infection                                                           | LOS                                                     | Trend, although not significant, in correlation between RSV CT-value and LOS ( $p = 0.05$ )                                                  |
| [20]      | Cross-sectional study on infants $\leq 1$ year hospitalized for bronchiolitis, NPW at admission with RSV load (copies/mL)<br><b>Exclusion criteria:</b> BPD, CHD, CF, bronchiolitis obliterans, Bordetella pertussis infection, previous macrolides treatment                                                                                                                                                                                                                                         | 110 patients,<br>56/110 samples analyzed with RSV load by quantitative RT-PCR                                                                                                            | Duration of wheezing, LOS<br>Duration of oxygen therapy | No correlation between RSV load and duration of wheezing ( $p > 0.05$ ),<br>LOS ( $p > 0.05$ ),<br>duration of oxygen therapy ( $p > 0.05$ ) |
| [21]      | Prospective study on children (age not specified) hospitalized for LRTI (pneumonia, bronchitis, bronchiolitis), NPA at admission with RSV load (copies/mL)<br><b>No exclusion criteria</b>                                                                                                                                                                                                                                                                                                            | 387 patients,<br>160/387 patients with bronchiolitis, RSV 1 <sup>st</sup> pathogen in bronchiolitis (data about frequency NA)                                                            | Specified criteria for severity disease definition      | No correlation between RSV load and severity disease defined by specified clinical signs ( $p > 0.05$ )                                      |
| [26]      | Prospective study on children $< 2$ years hospitalized for RSV bronchiolitis, NP swab at admission and daily during hospitalization, then weekly until no more RSV detection, with RSV viral load ( $\log_{10}$ RNA copies/mL)<br><b>Exclusion criteria:</b> Use of Palivizumab, drop-out at follow-up                                                                                                                                                                                                | 38 patients,<br>247 samples                                                                                                                                                              | Need for PICU,<br>Need for intubation, LOS              | No significant differences in RSV load and need for PICU ( $p > 0.05$ ), nor for intubation ( $p > 0.05$ ), nor prolonged LOS ( $p > 0.05$ ) |

Table S3. Studies finding no correlation between RSV load and bronchiolitis severity.

## References

7. Garcia-Mauriño, C.; Moore-Clingenpeel, M. Viral Load Dynamics and Clinical Disease Severity in Infants With Respiratory Syncytial Virus Infection. *J Infect Dis* **2019**, *219*(8), 1207–1215.
8. Hall, C.B.; Douglas, R.G. Respiratory syncytial virus infections in infants: quantitation and duration of shedding. *J Pediatr* **1976**, *89*(1), 11–15.
9. Buckingham, S.C.; Bush, A.J. Nasal quantity of respiratory syncytial virus correlates with disease severity in hospitalized infants. *Pediatr Infect Dis J* **2000**, *19*(2), 113–117.
10. Wright, P.F.; Gruber, W.C. Illness severity, viral shedding, and antibody responses in infants hospitalized with bronchiolitis caused by respiratory syncytial virus. *J Infect Dis* **2002**, *185*(8), 1011–1018.
11. DeVincenzo, J.P.; El Saleeby, C.M. Respiratory syncytial virus load predicts disease severity in previously healthy infants. *J Infect Dis* **2005**, *191*(11), 1861–1868.
12. Fodha, I.; Vabret, A. Respiratory syncytial virus infections in hospitalized infants: association between viral load, virus subgroup, and disease severity. *J Med Virol* **2007**, *79*(12), 1951–1958.
13. Houben, M.L.; Coenjaerts, F.E. Disease severity and viral load are correlated in infants with primary respiratory syncytial virus infection in the community. *J Med Virol* **2010**, *82*(7), 1266–1271.
14. El Saleeby, C.M.; Bush, A.J. Respiratory syncytial virus load, viral dynamics, and disease severity in previously healthy naturally infected children. *J Infect Dis* **2011**, *204*(7), 996–1002.
15. Van Leeuwen, J.C.; Goossens, L.K. Equal virulence of rhinovirus and respiratory syncytial virus in infants hospitalized for lower respiratory tract infection. *Pediatr Infect Dis J* **2012**, *31*(1), 84–86.
16. Scagnolari, C.; Midulla, F. Evaluation of viral load in infants hospitalized with bronchiolitis caused by respiratory syncytial virus. *Med Microbiol Immunol* **2012**, *201*(3), 311–317.
17. Zhou, L.; Xiao, Q. The impact of viral dynamics on the clinical severity of infants with respiratory syncytial virus bronchiolitis. *J Med Virol* **2015**, *87*(8), 1276–1284.
18. Hasegawa, K.; Jartti, T. Respiratory syncytial virus genomic load and disease severity among children hospitalized with bronchiolitis: multicenter cohort studies in the United States and Finland. *J Infect Dis* **2015**, *211*(10), 1550–1559.
19. Skjerven, H.O.; Megremis, S. Virus Type and Genomic Load in Acute Bronchiolitis: Severity and Treatment Response With Inhaled Adrenaline. *J Infect Dis* **2016**, *213*(6), 915–921.
20. Souza, A.P.; Leitão, L.A. Lack of association between viral load and severity of acute bronchiolitis in infants. *J Bras Pneumol* **2016**, *42*(4), 261–265.
21. Yan, X.L.; Li, Y.N. Clinical characteristics and viral load of respiratory syncytial virus and human metapneumovirus in children hospitalized for acute lower respiratory tract infection. *J Med Virol* **2017**, *89*(4), 589–597.
22. Espinosa, Y.; San Martín, C. Genomic Loads and Genotypes of Respiratory Syncytial Virus: Viral Factors during Lower Respiratory Tract Infection in Chilean Hospitalized Infants. *Int J Mol Sci.* 2017 Mar 21;18(3):654. doi: 10.3390/ijms18030654. PMID: 28335547; PMCID: PMC5372666.
23. Piedra, F.A.; Mei, M. The interdependencies of viral load, the innate immune response, and clinical outcome in children presenting to the emergency department with respiratory syncytial virus-associated bronchiolitis. *PLoS One.* 2017 Mar 7;12(3):e0172953. doi: 10.1371/journal.pone.0172953. PMID: 28267794; PMCID: PMC5340370.
24. Thwaites, R.S.; Coates, M. Reduced Nasal Viral Load and IFN Responses in Infants with Respiratory Syncytial Virus Bronchiolitis and Respiratory Failure. *Am J Respir Crit Care Med* **2018**, *198*(8), 1074–1084.

25. De Paulis, M.; Oliveira, D.B.L. The importance of viral load in the severity of acute bronchiolitis in hospitalized infants. *Clinics (Sao Paulo)* **2021**, *76*, e3192.
26. Watanabe, R.A.S.; Cruz, J.S. Respiratory syncytial virus: viral load, viral decay, and disease progression in children with bronchiolitis. *Braz J Microbiol* **2022**, *53*(3), 1241-1247.

**Disclaimer/Publisher's Note:** The statements, opinions and data contained in all publications are solely those of the individual author(s) and contributor(s) and not of MDPI and/or the editor(s). MDPI and/or the editor(s) disclaim responsibility for any injury to people or property resulting from any ideas, methods, instructions or products referred to in the content.
